# Supplementary material for: Antibodies to the RBD of SARS-CoV-2 spike mediate productive infection of primary human macrophages
Source: Springer Nature journal article supplement (doi:10.1038/s41467-024-54458-w), 2024-12-30
Supplement: MOESM1 [file 41467_2024_54458_MOESM1_ESM.pdf]

# Supplementary Figure 1

Dual HeLa-ACE2/THP-1 assay set-up with SARS-CoV-1 and additional information relating to Figures 1 and 2

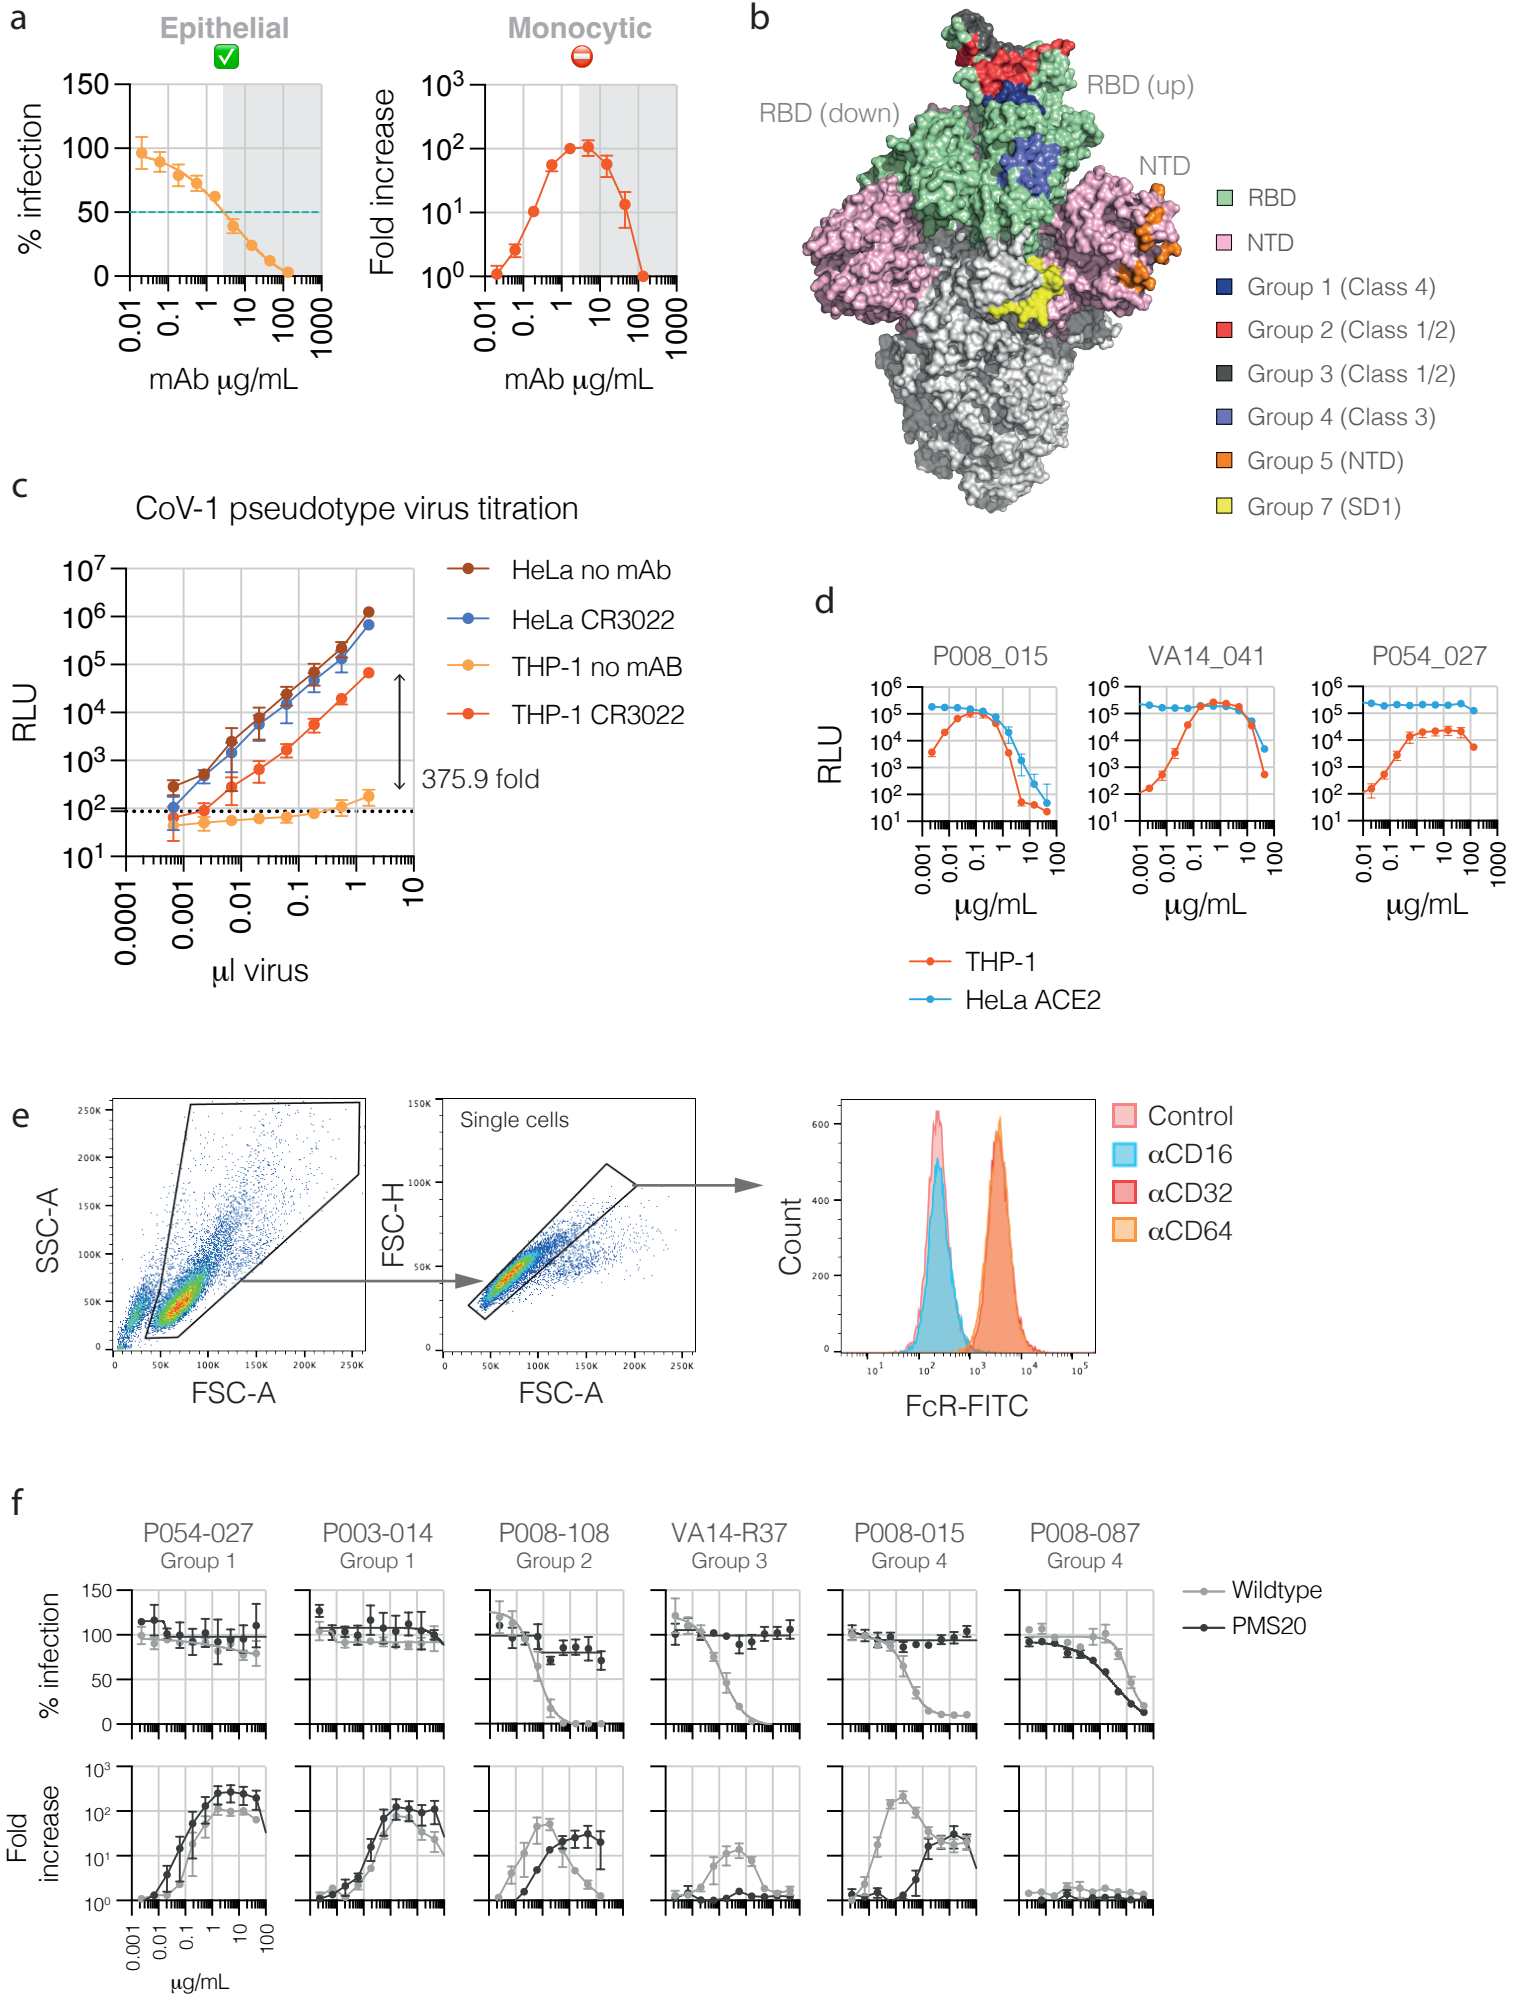

## Supplementary Figure 1

### Dual HeLa-ACE2/THP-1 assay set-up with SARS-CoV-1 and additional information relating to figures 1 and 2

(a) Assays were performed in parallel on permissive epithelial cells (HeLa-ACE2) and non-permissive monocytic cells (THP-1) using HIV-1-based pseudoviruses bearing SARS-CoV-1 spikes pre-incubated with 3-fold dilutions of anti-SARS-CoV-1 mAb CR3022. Infection was measured by luciferase assay 48 hours later, with % infection and fold increase calculated relative to infection levels in the absence of antibody (in the case of THP-1 cells this is background relative light units (RLU)). Grey shaded areas indicate mAb concentrations at which greater than 50% neutralisation occurs. Means are derived from n=3 independent experiments, error bars  $\pm$ SEM.

(b) Surface representation of SARS-CoV-2 spike showing antibody binding epitopes as characterised previously (PDB: 6Xm0) [1, 43] and with corresponding antibody binding classes as characterised by Barnes et al. [2] shown in parentheses.

(c) Increasing quantities of HIV-1-based pseudoviruses with SARS-CoV-1 spikes were incubated with CR3022 (2  $\mu$ g/ml) or no mAb as a control for 1 hour, before adding to permissive HeLa-ACE2 cells or non-permissive THP-1 cells. 48 hours later raw RLUs were determined by luciferase assay. Means are derived from n=3 independent experiments, error bars  $\pm$ SD.

(d) Raw RLU values from three mAb titrations shown in Figure 1a. Means are derived from n=2 independent experiments, error bars  $\pm$ SEM.

(e) Flow cytometry gating strategy and histograms showing major Fc receptors CD64 (Fc $\gamma$ RI), CD32 (Fc $\gamma$ RII) and CD16 (Fc $\gamma$ RIII) expression on THP-1 cells.

(f) Representative mAbs from each of the four RBD binding groups shown in (b) were tested in parallel HeLa-ACE2 and THP-1 assays, as for Figure 2, using pseudoviruses with PMS20 spikes – a synthetic spike with maximum wave 1 polyclonal neutralisation resistance – or its unmutated wildtype equivalent [46]. Means are derived from n=3 independent experiments, error bars  $\pm$ SEM.

# Supplementary Figure 2

Infection of differentiated THP-1 cells and iPSC-derived macrophages by SARS-CoV-2

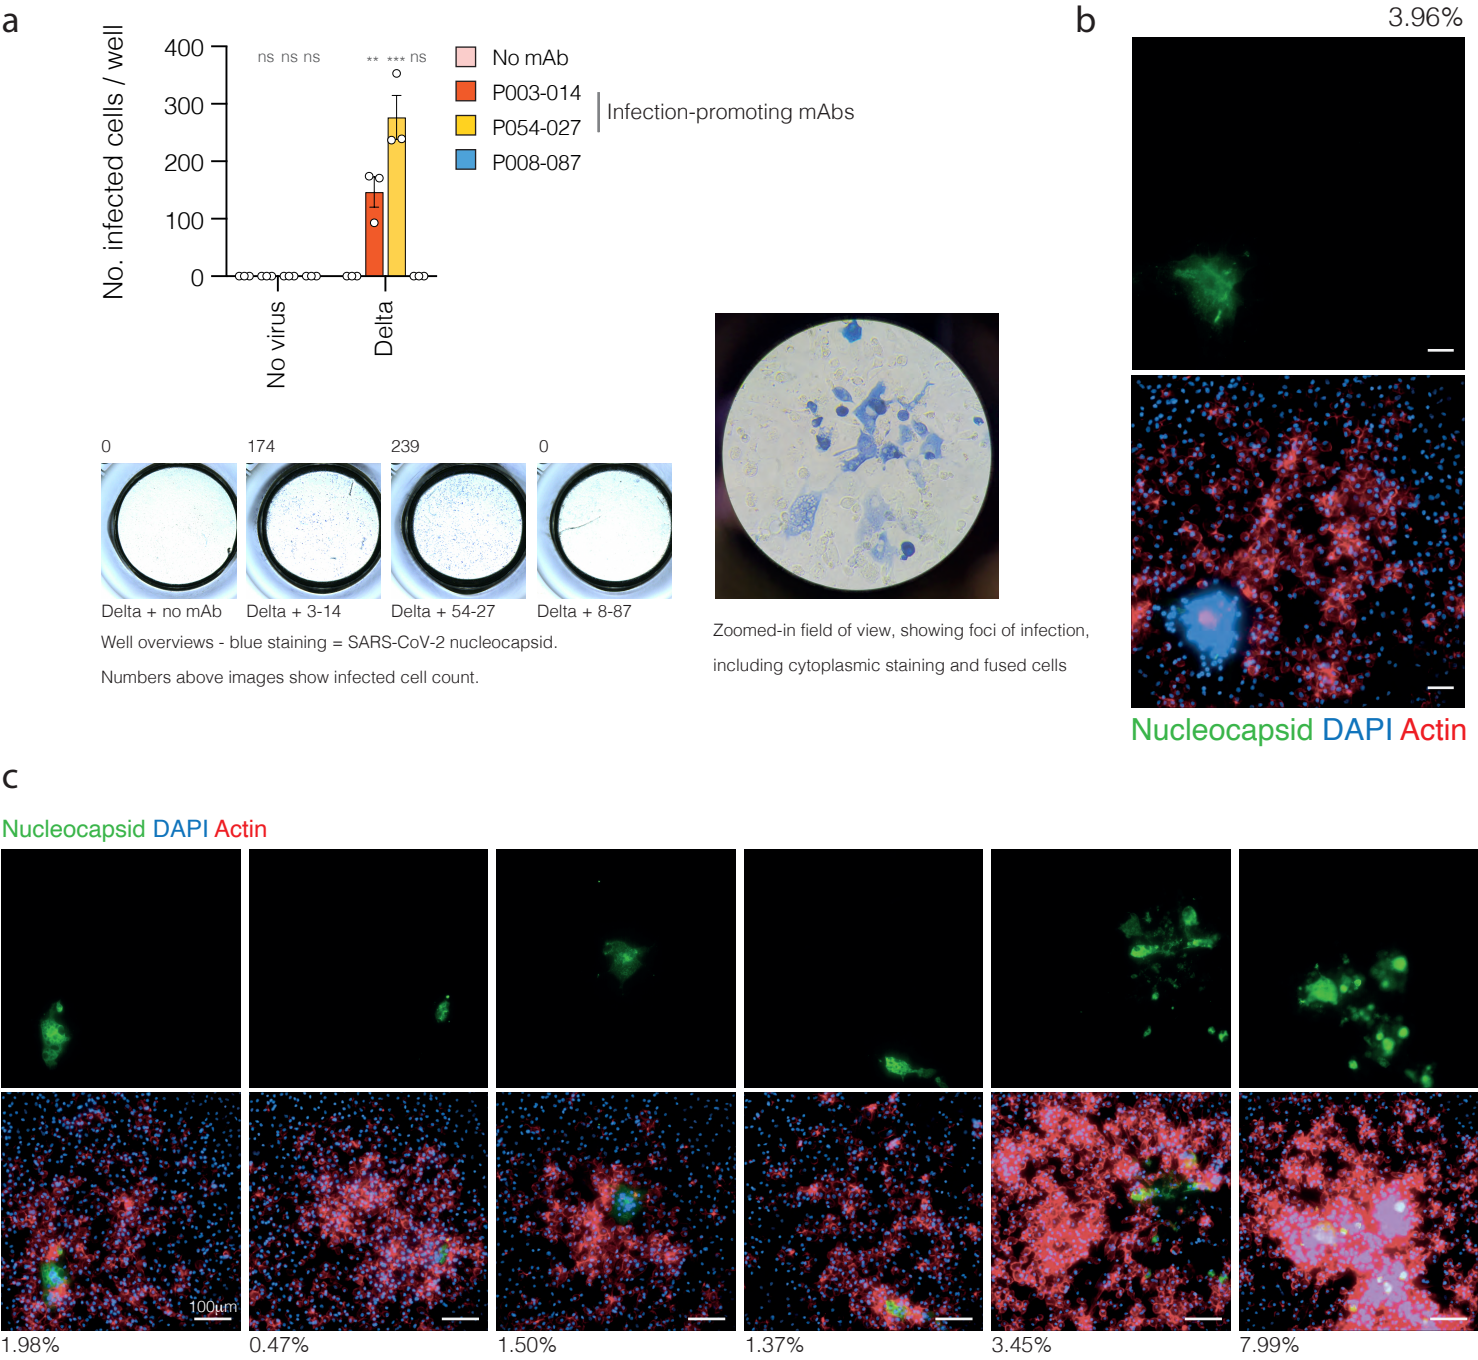

## Supplementary Figure 2

### Infection of differentiated THP-1 cells and iPSC-derived macrophages by SARS-CoV-2

(a) Delta virus was preincubated with infection-promoting mAbs P003\_014, P054\_027 or non infection-promoting control mAb P008\_087 at 6  $\mu\text{g}/\text{ml}$  prior to addition to PMA-differentiated THP-1 cells at an MOI of 1. 72 hours later cells were intracellularly stained for SARS-CoV-2 nucleocapsid and the number of infected cells per well determined by ELISPOT. Means are derived from  $n=3$  independent experiments, error bars  $\pm\text{SEM}$ . Infection levels in the presence of each mAb were compared to no mAb using two-way ANOVA with mixed effects analyses.  $P=0.0039$  for mAb P003\_014 and  $0.0001$  for P054\_027 ( $>0.1$  (ns),  $<0.1$  (\*),  $<0.01$  (\*\*),  $<0.001$  (\*\*\*),  $<0.0001$  (\*\*\*\*)).

(b) Representative images from XEGX\_1 iPSC-derived macrophage infections shown in Figure 5a. Green, SARS-CoV-2 nucleocapsid; red, actin; blue, DAPI. Scale bar 50  $\mu\text{m}$ . % infection for the field of view shown is indicated above the image.

(c) Additional representative images of iPSC-derived macrophages infected with SARS-CoV-2, from experiments shown in Figure 5a. Green, SARS-CoV-2 nucleocapsid; red, actin; blue, DAPI. Scale bars 100  $\mu\text{m}$ . Top row show nucleocapsid staining only. % infection for each individual field of view is shown below each image.

# Supplementary Figure 3

Additional images of SARS-CoV-2 infected macrophages, Fc receptor expression on primary human macrophages and treatment with inhibitors

a

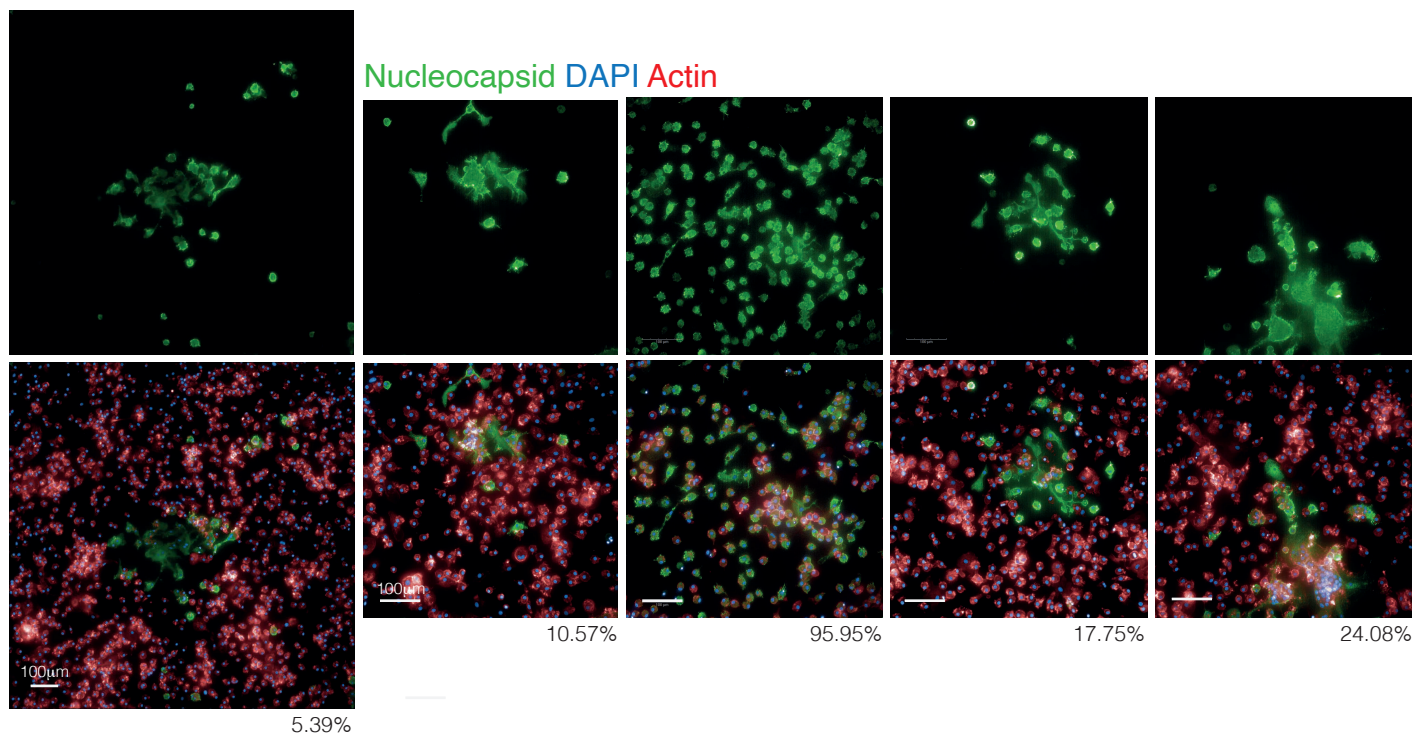

b

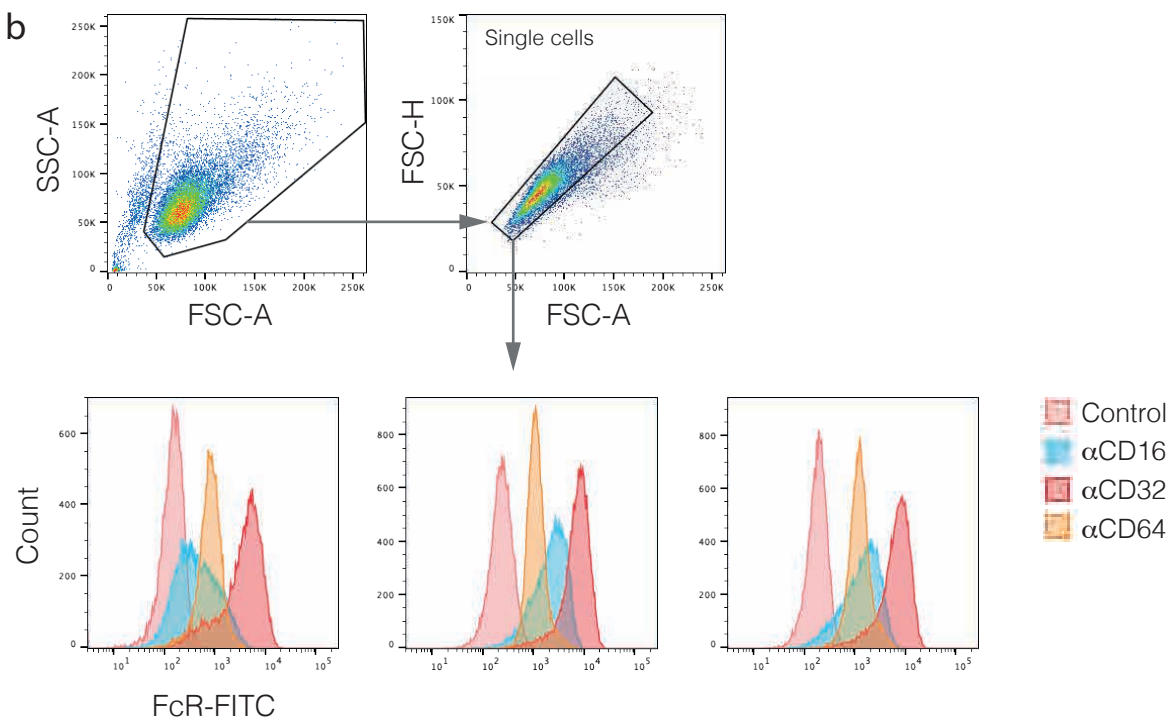

c

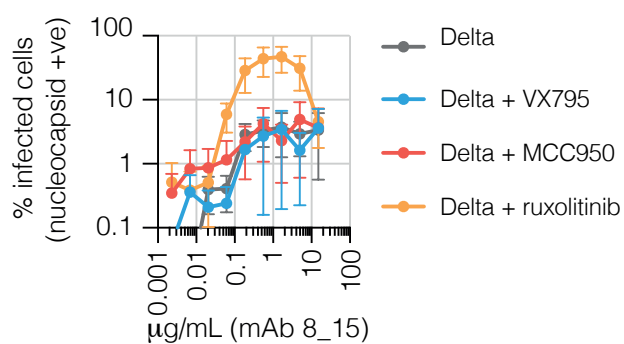

d

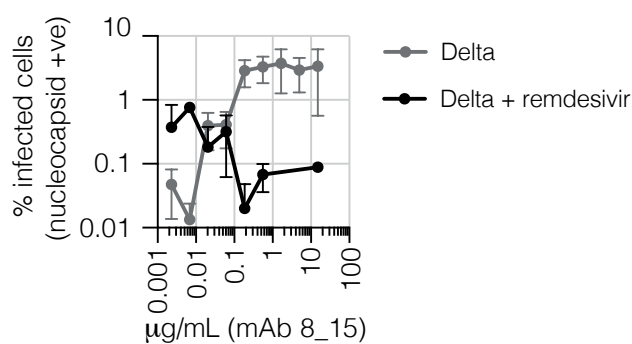

### Supplementary Figure 3

#### **Additional images of SARS-CoV-2 infected macrophages, Fc receptor expression on primary human macrophages and treatment with inhibitors**

(a) Additional images of primary human macrophages infected with SARS-CoV-2, from experiments shown in Figure 5b and 6a. Scale bars 100  $\mu$ m. Green, SARS-CoV-2 nucleocapsid; red, actin; blue, DAPI. % infection for each individual field of view is shown below each image.

(b) Flow cytometry gating strategy and histograms showing the expression of major Fc receptors CD64 (Fc $\gamma$ RI), CD32 (Fc $\gamma$ RII) and CD16 (Fc $\gamma$ RIII) on primary human monocyte-derived macrophages. A representative example of the gating strategy is shown for one donor, and Fc receptor expression is shown for three individual donors.

(c-d) Primary monocyte-derived macrophages were infected as in Figure 6a with delta virus at an MOI of 1, pre-incubated with mAb P008\_015 in the presence of caspase-1 and -2 inhibitor VX-755, NLRP3 inflammasome inhibitor MCC950 or ruxolitinib (c) or remdesivir (d). Means are derived from n=3 independent experiments, error bars  $\pm$ SEM.

# Supplementary Figure 4

Correlations between productive infection and cytokine production in primary human macrophages

a

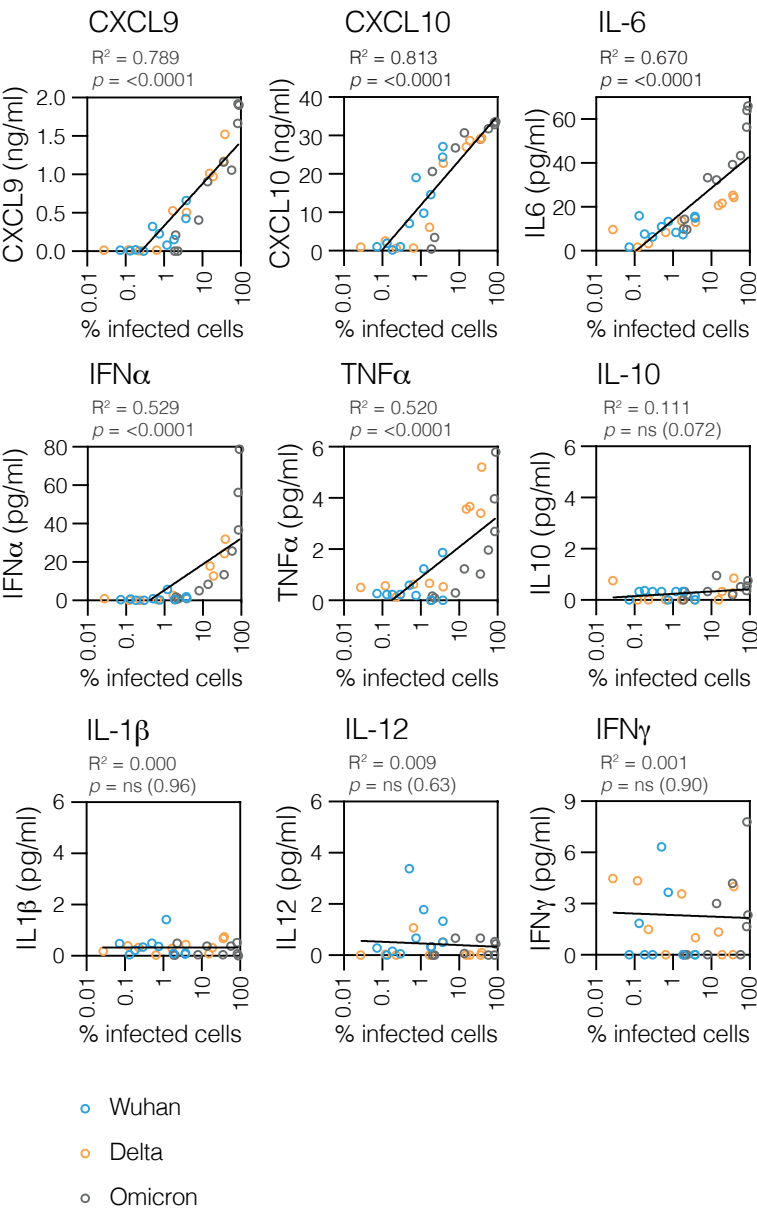

b

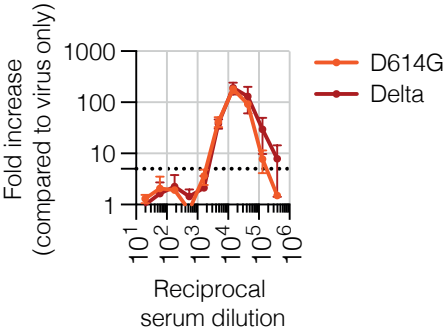

## Supplementary Figure 4

### Correlations between infection and cytokine production in primary human macrophages

(a) Correlations between % infected cells in the presence of ruxolitinib and production of cytokines for experiments shown in Figure 6a.  $R^2$  and  $p$  values were determined by two-tailed Pearson correlation,  $>0.1$  (ns),  $<0.1$  (\*),  $<0.01$  (\*\*),  $<0.001$  (\*\*\*),  $<0.0001$  (\*\*\*\*).

(b) Serum sample from a delta-infected individual, shown in Figure 7b, was tested in THP-1 assays with delta and D614G spike-pseudotypes. Means are derived from  $n=3$  independent experiments, error bars  $\pm$ SEM.

## Analysis Sequence "20230123 SP Primary Macs Thr@12000"

| Input Image                         | Input                                                                                                                                                |                                                                                                                                                           |                                       |
|-------------------------------------|------------------------------------------------------------------------------------------------------------------------------------------------------|-----------------------------------------------------------------------------------------------------------------------------------------------------------|---------------------------------------|
|                                     | <b>Flatfield Correction</b> : Basic<br>Brightfield Correction<br><b>Stack Processing</b> : Individual Planes<br><b>Min. Global Binning</b> : Dynamic |                                                                                                                                                           |                                       |
| Find Nuclei                         | Input                                                                                                                                                | Method                                                                                                                                                    | Output                                |
|                                     | <b>Channel</b> : DAPI<br><b>ROI</b> : None                                                                                                           | <b>Method</b> : C<br>Common Threshold : 0.4<br>Area : > 30 $\mu\text{m}^2$<br>Splitting Coefficient : 7<br>Individual Threshold : 0.4<br>Contrast : > 0.1 | Output Population : Nuclei            |
| Find Cytoplasm                      | Input                                                                                                                                                | Method                                                                                                                                                    | Output                                |
|                                     | <b>Channel</b> : Alexa 647<br><b>Nuclei</b> : Nuclei                                                                                                 | <b>Method</b> : C<br>Common Threshold : <u>0.2</u><br>Individual Threshold : <u>0.3</u>                                                                   |                                       |
| Select Population                   | Input                                                                                                                                                | Method                                                                                                                                                    | Output                                |
|                                     | <b>Population</b> : Nuclei                                                                                                                           | <b>Method</b> : Common Filters<br>Remove Border Objects<br>Region : Cell                                                                                  | Output Population : Nuclei Selected   |
| Calculate Morphology Properties (2) | Input                                                                                                                                                | Method                                                                                                                                                    | Output                                |
|                                     | <b>Population</b> : Nuclei Selected<br><b>Region</b> : Cell                                                                                          | <b>Method</b> : Standard<br>Area<br>Roundness<br>Width<br>Length<br>Ratio Width to Length                                                                 | Property Prefix : Cell                |
| Calculate Intensity Properties      | Input                                                                                                                                                | Method                                                                                                                                                    | Output                                |
|                                     | <b>Channel</b> : DAPI<br><b>Population</b> : Nuclei                                                                                                  | <b>Method</b> : Standard Mean                                                                                                                             | Property Prefix : Intensity Cell DAPI |

|                                           |                                                                                           |                                                                                      |                                               |
|-------------------------------------------|-------------------------------------------------------------------------------------------|--------------------------------------------------------------------------------------|-----------------------------------------------|
|                                           | <b>Region :</b> Cell                                                                      | Standard Deviation<br>Coefficient of Variance<br>Median<br>Sum<br>Maximum<br>Minimum |                                               |
| <b>Calculate Intensity Properties (2)</b> | <b>Input</b>                                                                              | <b>Method</b>                                                                        | <b>Output</b>                                 |
|                                           | <b>Channel :</b> Alexa 488<br><b>Population :</b> Nuclei Selected<br><b>Region :</b> Cell | <b>Method :</b> Standard Mean                                                        | Property Prefix :<br>Intensity Cell Alexa 488 |
| <b>Select Population (2)</b>              | <b>Input</b>                                                                              | <b>Method</b>                                                                        | <b>Output</b>                                 |
|                                           | <b>Population :</b> Nuclei Selected                                                       | <b>Method :</b> Filter by Property<br>Intensity Cell Alexa 488 Mean : > <u>12000</u> | Output Population :<br>GFP+                   |

|                       |                                                                                                                                                                                                                                                                                                                                                                                                                                                                                                                                                                                                                                                                                                                                                                                                                                                                                                                                                                                                                                                                                                                                                                                                                                                                                                                          |
|-----------------------|--------------------------------------------------------------------------------------------------------------------------------------------------------------------------------------------------------------------------------------------------------------------------------------------------------------------------------------------------------------------------------------------------------------------------------------------------------------------------------------------------------------------------------------------------------------------------------------------------------------------------------------------------------------------------------------------------------------------------------------------------------------------------------------------------------------------------------------------------------------------------------------------------------------------------------------------------------------------------------------------------------------------------------------------------------------------------------------------------------------------------------------------------------------------------------------------------------------------------------------------------------------------------------------------------------------------------|
| <b>Define Results</b> | <b>Results</b>                                                                                                                                                                                                                                                                                                                                                                                                                                                                                                                                                                                                                                                                                                                                                                                                                                                                                                                                                                                                                                                                                                                                                                                                                                                                                                           |
|                       | <p><b>Method :</b> List of Outputs<br/> <b>Population : Nuclei Selected</b><br/>           Number of Objects<br/>           Apply to All : Mean+StdDev<br/>           Cell Area [<math>\mu\text{m}^2</math>] : Mean+StdDev<br/>           Cell Roundness : Mean+StdDev<br/>           Cell Width [<math>\mu\text{m}</math>] : Mean+StdDev<br/>           Cell Length [<math>\mu\text{m}</math>] : Mean+StdDev<br/>           Cell Ratio Width to Length : Mean+StdDev<br/>           Intensity Cell Alexa 488 Mean : Mean+StdDev<br/>           GFP+ : Mean+StdDev</p> <p><b>Population : Nuclei</b><br/>           Apply to All : None</p> <p><b>Population : GFP+</b><br/>           Number of Objects<br/>           Apply to All : Mean+StdDev<br/>           Cell Area [<math>\mu\text{m}^2</math>] : Mean+StdDev<br/>           Cell Roundness : Mean+StdDev<br/>           Cell Width [<math>\mu\text{m}</math>] : Mean+StdDev<br/>           Cell Length [<math>\mu\text{m}</math>] : Mean+StdDev<br/>           Cell Ratio Width to Length : Mean+StdDev<br/>           Intensity Cell Alexa 488 Mean : Mean+StdDev</p> <p><b>Method :</b> Formula Output<br/>           Formula : <math>100 \cdot a/b</math><br/>           Population Type : Objects<br/>           Variable a : GFP+ - Number of Objects</p> |

Variable b : Nuclei Selected - Number of Objects  
Output Name : % Cells +

**Object Results**

Population : Nuclei Selected : None

Population : Nuclei : None

Population : GFP+ : None

Acapella version: 5.1.2.129056. Timestamp: 2023-09-05 09:52:44 -0400.

## Supplementary Figure 5

Analysis pipeline for high-content imaging.

**Supplementary Table 1**

Baseline characteristics of the 43 human serum sample donors (SARS-CoV-2 infected individuals).

| <b>Sex</b>      |                    |
|-----------------|--------------------|
| Male, no. (%)   | 24 (55.8)          |
| Female, no. (%) | 19 (44.2)          |
| <b>Age</b>      |                    |
| Mean (range)    | 48.8 (17-91) years |
| <b>Severity</b> |                    |
| 0               | 7                  |
| 1               | 10                 |
| 2               | 9                  |
| 3               | 1                  |
| 4               | 11                 |
| 5               | 5                  |

**Supplementary Table 2**

Baseline characteristics of human blood donors used for monocyte/macrophage isolation.

| <b>Sex</b>                               |            |
|------------------------------------------|------------|
| Male, no. (%)                            | 7 (77.8)   |
| Female, no. (%)                          | 2 (22.2)   |
| <b>Age</b>                               |            |
| Mean (range)                             | 27 (24-31) |
| <b>Severity</b>                          |            |
| No underlying health conditions, no. (%) | 9 (100)    |
|                                          |            |

**Supplementary Table 3**

Analytes measured by CBA with BD Biosciences reference numbers.

| Analyte        | BD Biosciences ref. no. |
|----------------|-------------------------|
| IL-1 $\beta$   | 558279                  |
| IL-6           | 558276                  |
| IL-10          | 558274                  |
| IL-23/IL-12p40 | 560154                  |
| TNF $\alpha$   | 560112                  |
| IFN $\alpha$   | 560379                  |
| IFN $\gamma$   | 558269                  |
| CXCL9 (MIG)    | 558286                  |
| CXCL10 (IP-10) | 558280                  |
